# Supplementary material
Source: HighWire-hosted journal article supplement (https://bmjopen.bmj.com/content/13/3/e065625)
Supplement: inline-supplementary-material-1 [file inline-supplementary-material-1.pdf]

**Supplementary table 1. Exacerbation and mortality after 18 months of follow-up in COPD patients with different smoke history.**

| Variables                        | Never smoker<br>(n = 234) | Former smoker<br>(n = 478) | Current smoker<br>(n = 695) | P-value |
|----------------------------------|---------------------------|----------------------------|-----------------------------|---------|
| Exacerbations,<br>(Mean ± SD)    | 0.8 ± 1.5                 | 0.9 ± 1.4                  | 1.5 ± 1.9 <sup>a, b</sup>   | 0.008   |
| Exacerbations, n (%)             |                           |                            |                             | 0.006   |
| 0                                | 178 (73.6)                | 327 (70.2)                 | 438 (66.1) <sup>a, b</sup>  |         |
| 1                                | 28 (13.2)                 | 63 (14.4)                  | 108 (16.3)                  |         |
| ≥2                               | 22 (13.2)                 | 61 (15.4)                  | 117 (17.6) <sup>a, b</sup>  |         |
| Hospitalizations,<br>(Mean ± SD) | 0.4 ± 1.0                 | 0.4 ± 0.8                  | 0.6 ± 1.2 <sup>a, b</sup>   | 0.045   |
| Hospitalizations, n (%)          |                           |                            |                             | 0.035   |
| 0                                | 182 (79.8)                | 361 (78.8)                 | 480 (73.2) <sup>a, b</sup>  |         |
| ≥1                               | 46 (20.2)                 | 97 (21.2)                  | 176 (26.8) <sup>a, b</sup>  |         |
| Mortality, n (%)                 | 6 (2.6)                   | 20 (4.2)                   | 39 (5.6)                    | 0.135   |

**Notes:** <sup>a</sup> Compared with the Never smoker group, *P* < 0.05; <sup>b</sup> Compared with the Former smoker group, *P* < 0.05.

**Abbreviations:** COPD, Chronic Obstructive Pulmonary Disease; SD, Standard Deviation.

**Supplementary table 2. Exacerbation and mortality after 18 months of follow-up in COPD patients with different amounts of smoking (packs/year).**

| Variables                        | < 10 packs/year<br>(n = 239) | ≥ 10 packs/year<br>(n = 1168) | P -<br>value |
|----------------------------------|------------------------------|-------------------------------|--------------|
| Exacerbations,<br>(Mean ± SD)    | 0.8 ± 1.5                    | 0.7 ± 1.3                     | 0.306        |
| Exacerbations, n (%)             |                              |                               | 0.949        |
| 0                                | 147 (62.8)                   | 692 (62.5)                    |              |
| 1                                | 39 (16.7)                    | 194 (17.5)                    |              |
| ≥2                               | 48 (20.5)                    | 222 (20.0)                    |              |
| Hospitalizations,<br>(Mean ± SD) | 0.4 ± 1.0                    | 0.4 ± 0.8                     | 0.753        |
| Hospitalizations, n (%)          |                              |                               | 0.298        |
| 0                                | 180 (76.9)                   | 816 (73.6)                    |              |
| ≥1                               | 54 (23.1)                    | 292 (26.4)                    |              |
| Mortality, n (%)                 | 5 (2.5)                      | 60 (5.1)                      | 0.045        |

**Note:** COPD, Chronic Obstructive Pulmonary Disease; SD, Standard Deviation.

**Supplementary table 3. The baseline characteristics of more symptomatic COPD patients who remained in the study and lost to follow-up.**

| Variables                          | More symptomatic patients |                        | <i>P</i> - value |
|------------------------------------|---------------------------|------------------------|------------------|
|                                    | A <sub>1</sub> (n=1107)   | A <sub>2</sub> (n=281) |                  |
| Age (years), (Mean ± SD)           | 65.5 ± 8.0                | 65.6 ± 8.0             | 0.813            |
| Sex, n (%)                         |                           |                        |                  |
| Male                               | 988 (89.3)                | 250 (89.0)             |                  |
| Female                             | 119 (10.7)                | 31 (11.0)              |                  |
| Education level, n (%)             |                           |                        | 0.158            |
| Primary school                     | 455 (41.1)                | 130 (46.3)             |                  |
| Junior high school                 | 428 (38.7)                | 88 (31.3)              |                  |
| High school                        | 173 (15.7)                | 49 (17.4)              |                  |
| University                         | 51 (4.6)                  | 14 (5.0)               |                  |
| BMI (kg/m <sup>2</sup> )           | 22.3 ± 3.7                | 22.5 ± 3.7             |                  |
| Smoke history, n (%)               |                           |                        | 0.290            |
| Never smoker                       | 187 (16.9)                | 53 (18.9)              |                  |
| Former smoker                      | 385 (34.8)                | 84 (29.9)              |                  |
| Current smoker                     | 535 (48.3)                | 144 (51.2)             |                  |
| Smoking, (packs/year), (Mean ± SD) | 37.5 ± 28.6               | 36.1 ± 26.7            | 0.433            |
| Biofuel exposure, n (%)            |                           |                        | 0.493            |
| Yes                                | 440 (39.8)                | 118 (42.0)             |                  |
| No                                 | 667 (60.2)                | 163 (58.0)             |                  |
| Occupational exposure, n (%)       |                           |                        | 0.629            |
| Yes                                | 416 (37.6)                | 110 (39.1)             |                  |
| No                                 | 691 (62.4)                | 171 (60.9)             |                  |
| Pulmonary function, (Mean ± SD)    |                           |                        |                  |
| FEV1                               | 1.8 ± 0.5                 | 1.2 ± 0.5              | 0.908            |
| FEV1 %pred                         | 48.6 ± 19.0               | 49.5 ± 19.1            | 0.480            |
| FVC                                | 2.6 ± 0.7                 | 2.6 ± 0.7              | 0.439            |
| FEV1/FVC                           | 44.4 ± 12.2               | 44.7 ± 12.1            | 0.664            |
| PEF                                | 3.2 ± 1.4                 | 3.1 ± 1.4              | 0.498            |
| GOLD stages, n (%)                 |                           |                        | 0.706            |
| 1                                  | 71 (6.4)                  | 19 (6.8)               |                  |
| 2                                  | 408 (36.9)                | 110 (39.1)             |                  |
| 3                                  | 427 (38.6)                | 109 (38.8)             |                  |
| 4                                  | 201 (18.1)                | 43 (15.3)              |                  |
| CAT, (Mean ± SD)                   | 17.6 ± 5.4                | 17.3 ± 5.2             | 0.400            |
| mMRC, (Mean ± SD)                  | 2.3 ± 0.9                 | 2.3 ± 0.9              | 0.885            |
| CCQ, (Mean ± SD)                   | 23.7 ± 6.5                | 23.2 ± 6.4             | 0.206            |
| Treatments, n (%)                  |                           |                        |                  |
| LAMA                               | 363 (32.8)                | 101 (35.9)             | 0.317            |
| LABA + ICS                         | 82 (7.4)                  | 15 (5.3)               | 0.224            |
| LAMA + LABA                        | 24 (2.2)                  | 3 (1.1)                | 0.233            |
| LAMA + LABA + ICS                  | 558 (50.4)                | 137 (48.8)             | 0.621            |

|                                                   |             |            |       |
|---------------------------------------------------|-------------|------------|-------|
| Oxygen therapy, n (%)                             |             |            | 0.393 |
| Yes                                               | 92 (8.3)    | 19 (6.8)   |       |
| No                                                | 1015 (91.7) | 262 (93.2) |       |
| Exacerbations in the past year,<br>(Mean ± SD)    | 1.8 ± 3.3   | 1.9 ± 3.5  | 0.603 |
| Hospitalizations in the past year,<br>(Mean ± SD) | 0.8 ± 1.5   | 0.7 ± 1.3  | 0.467 |

**Notes:** A<sub>1</sub>: The COPD patients who remained in the study after 18 months of follow-up; A<sub>2</sub>: The COPD patients who lost to follow-up.

**Abbreviations:** BMI, Body Mass Index; COPD, Chronic Obstructive Pulmonary Disease; CAT, COPD Assessment Test; CCQ, Clinical COPD Questionnaire; FEV<sub>1</sub>, Forced Expiratory Volume in one second; FVC, Forced Vital Capacity; GOLD, Global Initiative for Chronic Obstructive Lung Disease; ICS, Inhaled Corticosteroid; LAMA, Long-Acting Muscarinic Antagonist; LABA, Long-Acting β<sub>2</sub>-Agonist; mMRC, modified Medical Research Council; PEF, Peak Expiratory Flow; SD, Standard Deviation.
